# Supplementary material for: Portable FRET-Based Biosensor Device for On-Site Lead Detections
Source: Preprints.org preprint supplement (doi:10.20944/preprints202201.0403.v1), 2022-01-26
Supplement: Supplementary file 2 [file supplementary]

Archive with 9 entries (8 files):
- preprints-54759-suppl/
- preprints-54759-suppl/biosensors-pMet-lead_Supp_info.pdf
- preprints-54759-suppl/Movie S1.gif
- preprints-54759-suppl/Movie S2.gif
- preprints-54759-suppl/Movie S3.gif
- preprints-54759-suppl/Movie S4.gif
- preprints-54759-suppl/Movie S5.gif
- preprints-54759-suppl/Movie S6.gif
- preprints-54759-suppl/Movie S7.mp4
