# Supplementary figures and images for: Portable FRET-Based Biosensor Device for On-Site Lead Detections
Source: Preprints.org preprint supplement (doi:10.20944/preprints202201.0403.v1), 2022-01-26

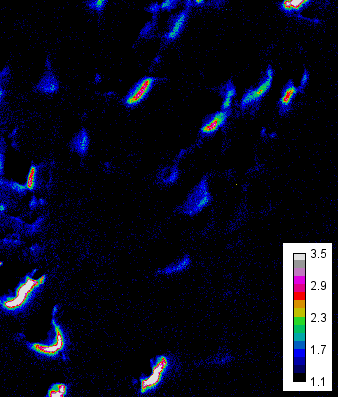

Supplement: Supplementary file 2 [file supplementary › preprints-54759-suppl/Movie S1.gif]

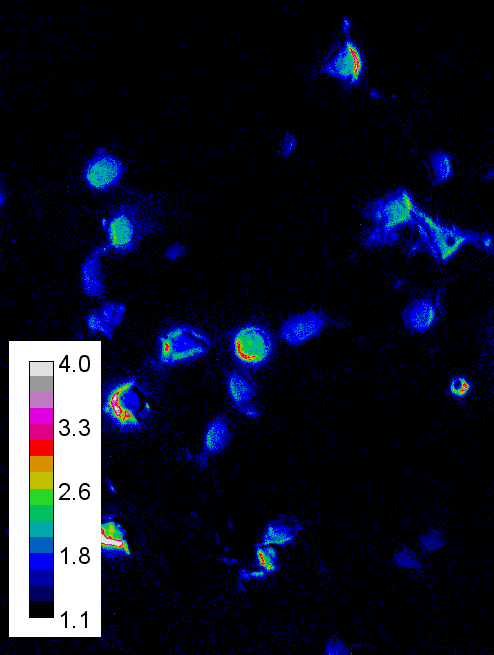

Supplement: Supplementary file 2 [file supplementary › preprints-54759-suppl/Movie S2.gif]

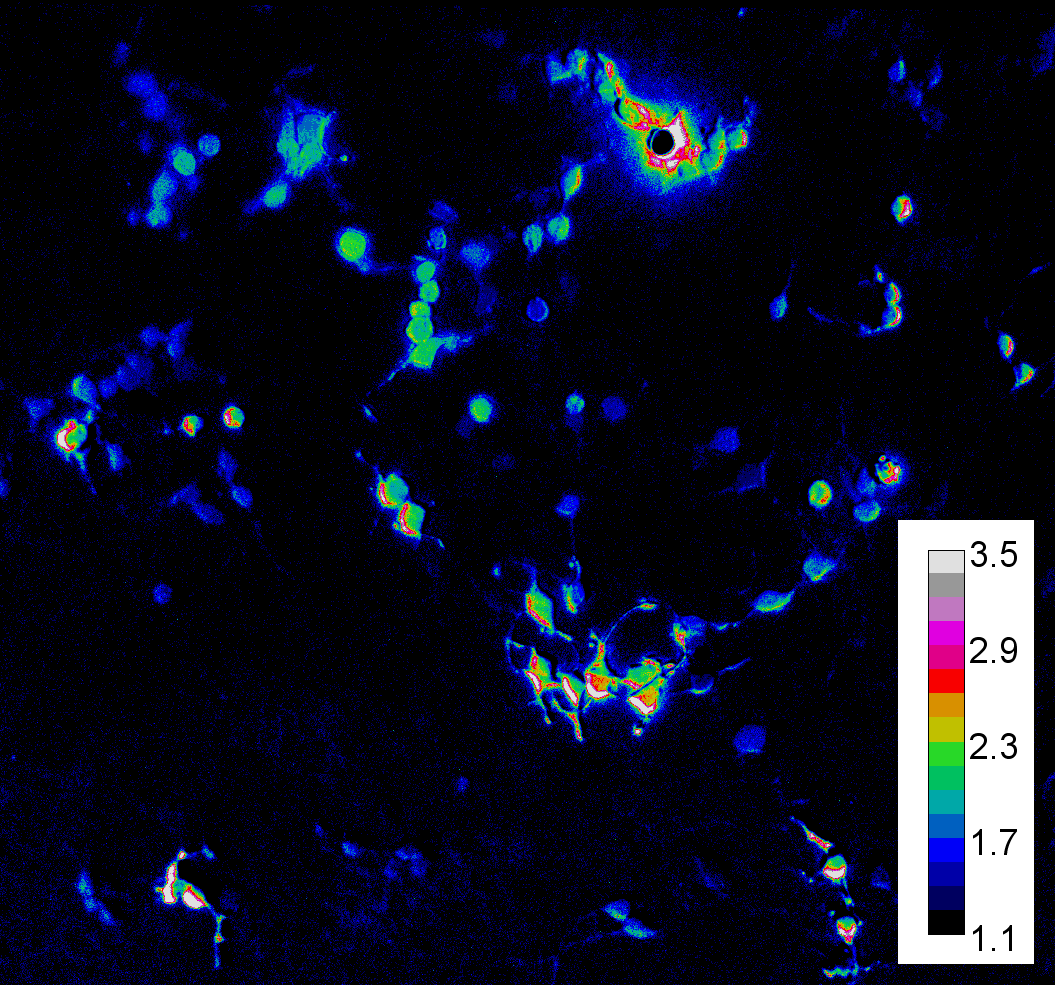

Supplement: Supplementary file 2 [file supplementary › preprints-54759-suppl/Movie S3.gif]

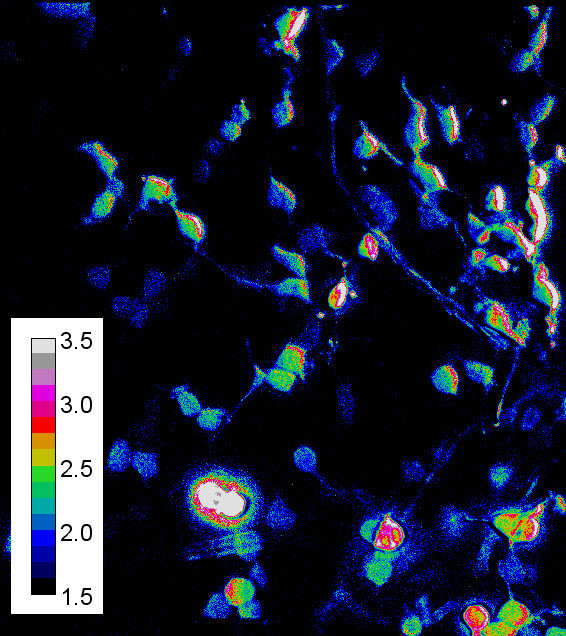

Supplement: Supplementary file 2 [file supplementary › preprints-54759-suppl/Movie S4.gif]

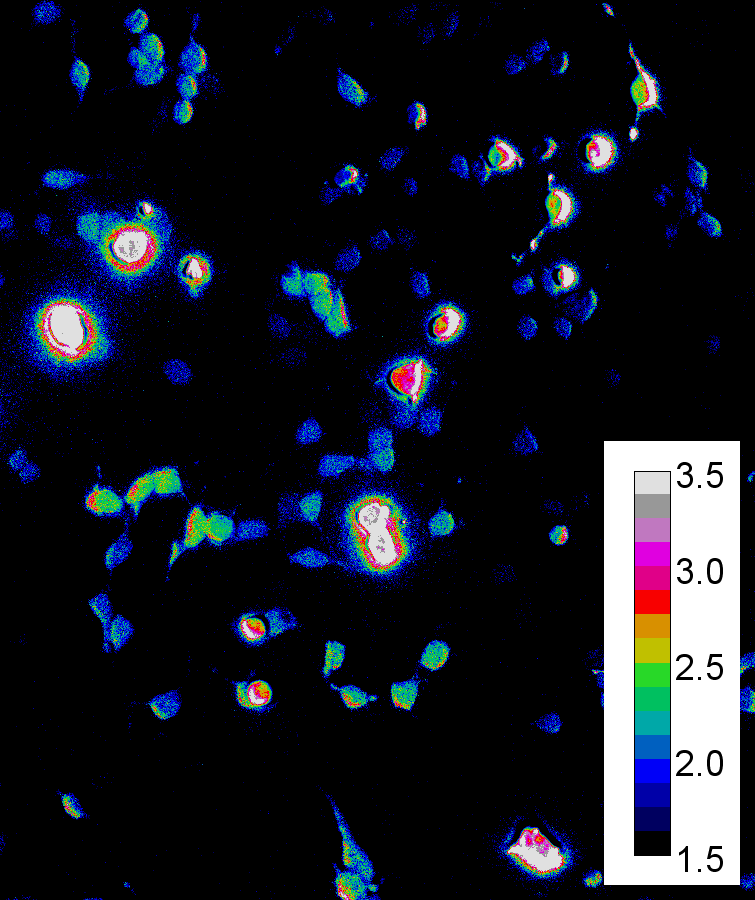

Supplement: Supplementary file 2 [file supplementary › preprints-54759-suppl/Movie S5.gif]

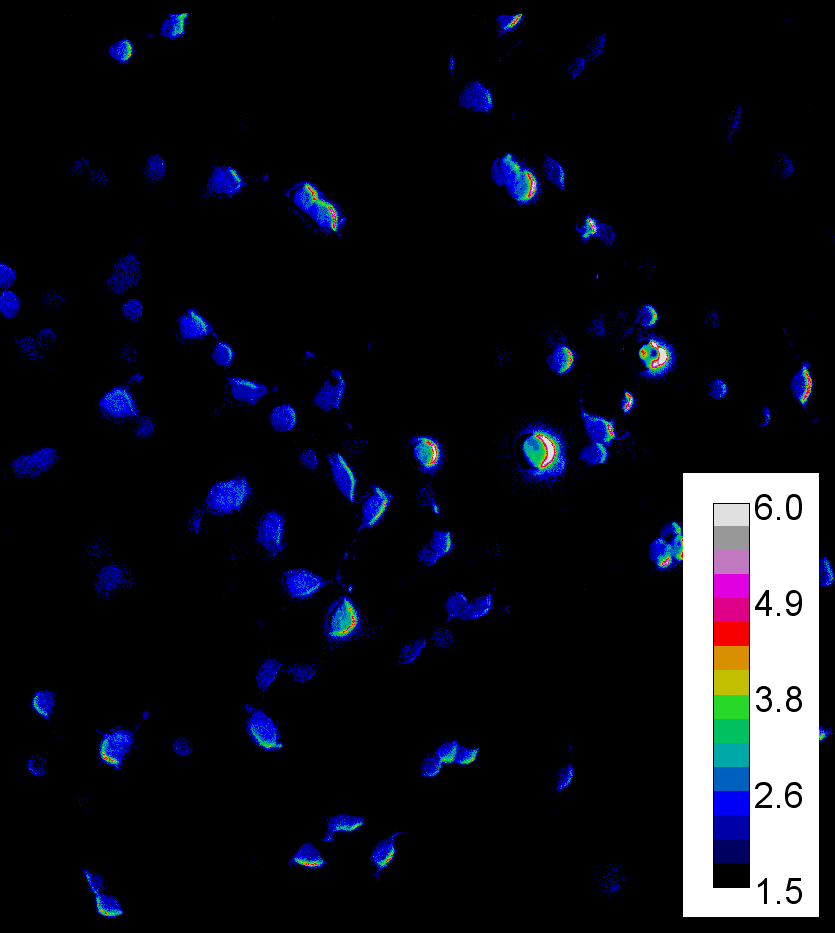

Supplement: Supplementary file 2 [file supplementary › preprints-54759-suppl/Movie S6.gif]
